# Supplementary material
Source: PubMed Central journal article supplement (PMC2975733)
Supplement: orl0072-0337-s01.pdf [file orl0072-0337-s01.pdf]

Supplementary 2

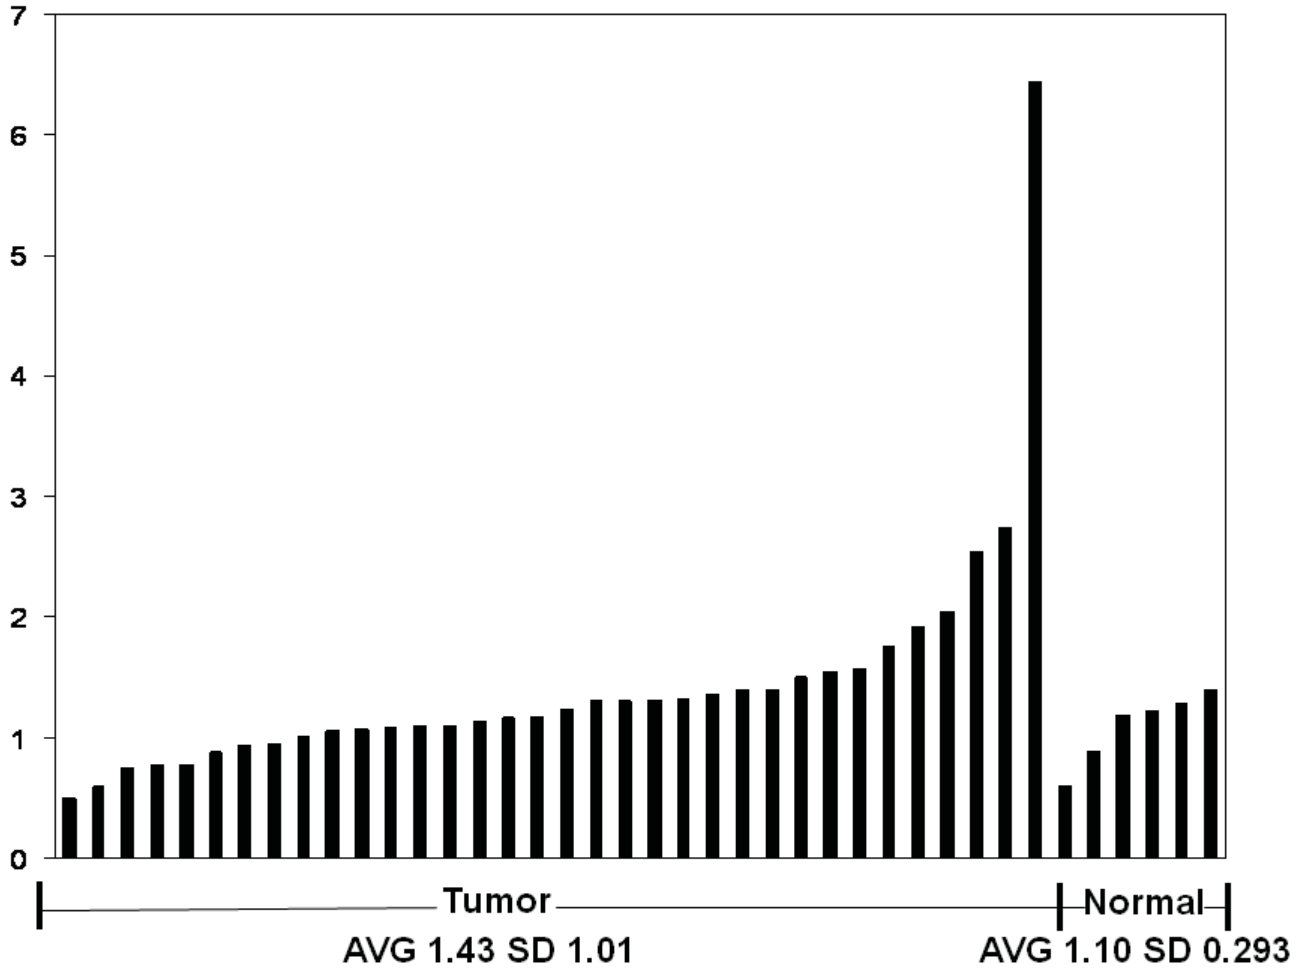

**Supplementary Table 1**

| <b>Diagnosis</b> | <b>Sex</b> | <b>Age</b> | <b>Race</b>      | <b>Site</b> | <b>Subsite</b>  | <b>Smoking Exposure</b> | <b>Alcohol History</b> |
|------------------|------------|------------|------------------|-------------|-----------------|-------------------------|------------------------|
| Normal Tissue    | Male       | 49         | African American | Larynx      | True Vocal Cord | Y                       | Y                      |
| Normal Tissue    | Female     | 62         | African American | Hypopharynx | Mucosa          | N                       | N                      |
| Normal Tissue    | Male       | 76         | Caucasian        | Larynx      | Supraglottic    | Y                       | Y                      |
| Normal Tissue    | Female     | 56         | Caucasian        | Oropharynx  | Tonsil          | Y                       | N/A                    |
| Normal Tissue    | Male       | 36         | Caucasian        | Oral Cavity | Buccal          | N                       | N/A                    |
| Normal Tissue    | Female     | 31         | Caucasian        | Oral Cavity | Buccal          | N                       | N/A                    |
|                  |            |            |                  |             |                 |                         |                        |
| T1 N0 M0         | Male       | 33         | Caucasian        | Oral Cavity | Tongue          | Y                       | Y                      |
| T3 N1 M0         | Male       | 41         | Caucasian        | Oral Cavity | Tongue          | Y                       | N                      |
| Tx N1 M0         | Male       | 63         | Caucasian        | Neck        | Neck            | Y                       | N                      |
| T3 N2b M0        | Female     | 54         | Caucasian        | Oropharynx  | Base of Tongue  | N                       | N                      |
| T2 N0 M0         | Female     | 45         | Caucasian        | Oral Cavity | Floor of Mouth  | Y                       | Y                      |
| T4 N1 M0         | Male       | 46         | Caucasian        | Hypopharynx | Pyriform        | Y                       | Y                      |
| T3 N0 M0         | Female     | 76         | Caucasian        | Oral Cavity | Buccal          | Y                       | Y                      |
| T1 N0 M0         | Male       | 68         | African American | Larynx      | True Vocal Cord | Y                       | Y                      |
